# Supplementary material
Source: Springer Nature journal article supplement (https://www.springermedizin.de/resource/supplementary/13002_2009_195_MOESM1_ESM.pdf/9627370)

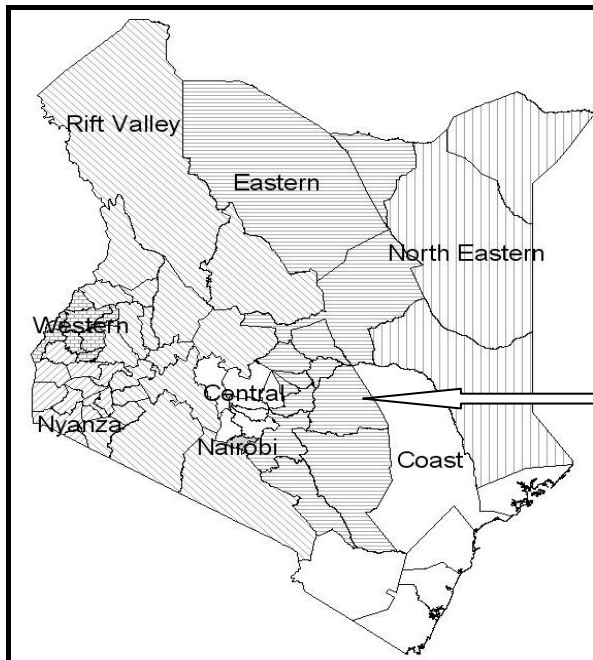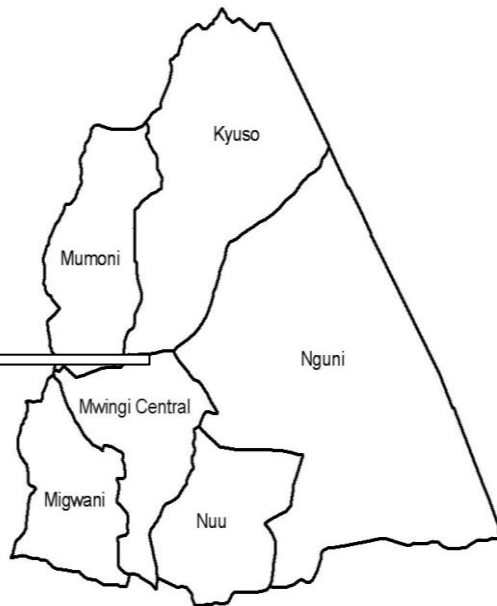

Supplement: MOESM1 [file 9627370]
